# Supplementary material
Source: MDPI journal article supplement (https://www.mdpi.com/2311-7524/9/2/131)
Supplement: s1 [file s1]

## Supporting Information

**Table S1.** List of primer sequences used for RT-PCR analysis.

| Genes          | Primers                    |                              |
|----------------|----------------------------|------------------------------|
| <i>TkBBM1</i>  | F: CAGTAATTTGGTTGTTGGGTGT  | R: CAGAGACCTACATTACTCCTATGTG |
| <i>TkBBM2</i>  | F: GTTCAATCTGAAGCACAGGCAT  | R: TCTCATACTACTTCCTGCAACC    |
| <i>TkWOX1</i>  | F: ATGATATTATGGCAAAGAGAGGT | R: TCATTTTGCACGACTATCTGTTG   |
| <i>TkWOX2</i>  | F: CAGAGCTGCAGGGCTCC       | R: GTTGTGCTTGCAATTGCCTC      |
| <i>TkSERK1</i> | F: CAGGAAGAGCCATGCAGC      | R: ATCAACTTTATCATCTTGACCAG   |
| <i>TkSERK2</i> | F: GTGGATGCGTCATCAGCTA     | R: ACTCATGCTCTCAGCGAATC      |
| <i>TkSERK3</i> | F: TTGCTTGATGATCTTGAGAGG   | R: GATGGAGTACCTATCTTCCACCAG  |
| <i>ACTIN</i>   | F: AAGGCATACTGGTGTGATGG    | R: GACCATCGGGAAGCTCATAG      |

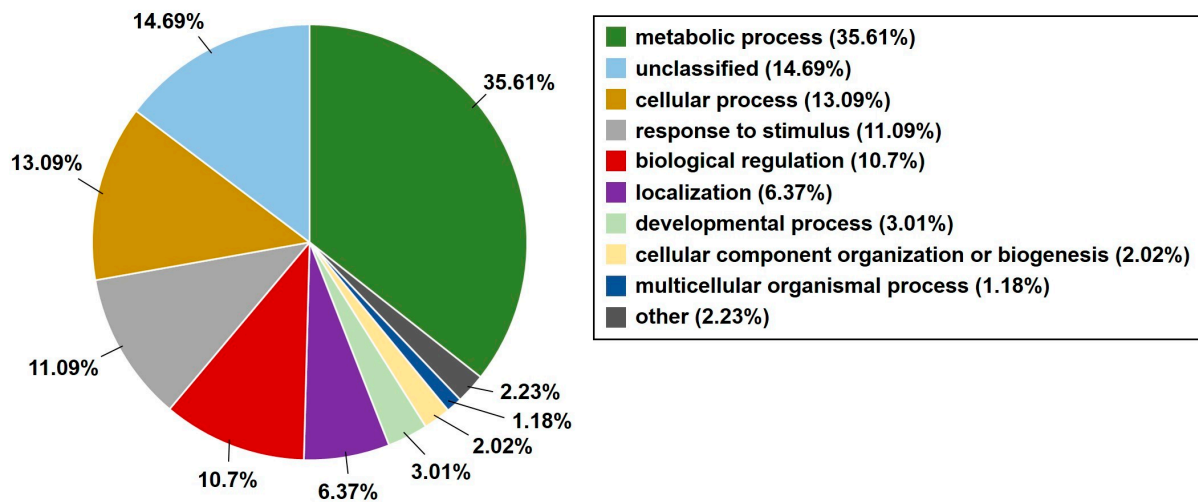

**Figure S1.** Distributions of the GO terms for the biological process

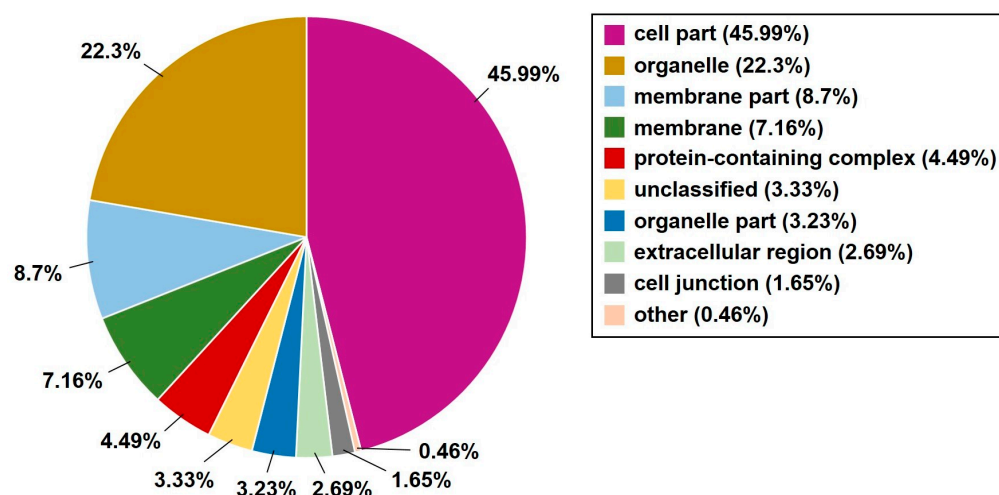

**Figure S2.** Distributions of the GO terms for the cellular process

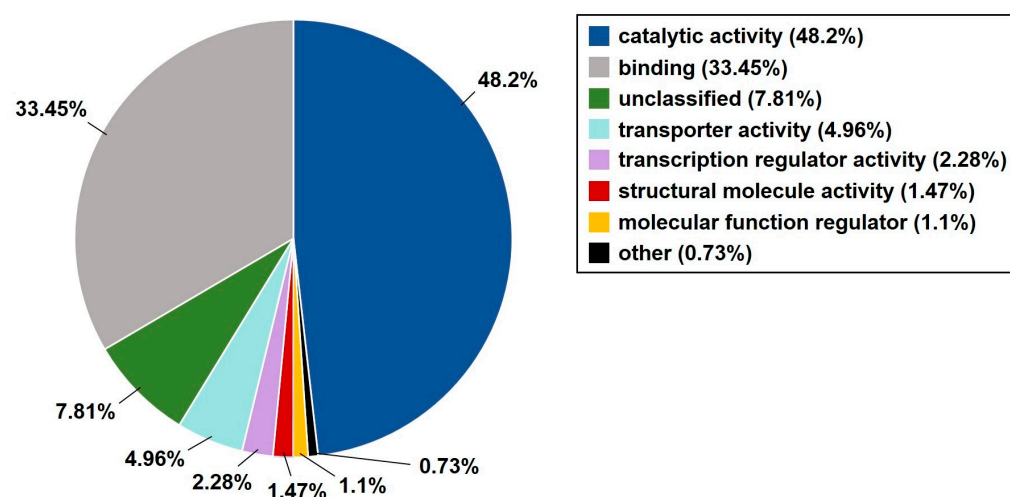

**Figure S3.** Distributions of the GO terms for the molecular process
